# Supplementary material for: Balance of Anthropogenic and Natural Greenhouse Gas Fluxes of All Inland Ecosystems of the Russian Federation and the Contribution of Sequestration in Forests
Source: MDPI journal article supplement (doi:10.3390/f15040707), 2024-04-17

Supplementary Material

**Balance of Anthropogenic and Natural Greenhouse Gas Fluxes of All Inland Ecosystems of the Russian Federation and the Contribution of Sequestration in Forests**

**Anna Romanovskaya, Vladimir Korotkov**

Figure S1. Net GHG fluxes from ecosystems by types of gases and by Russian territorial subjects, million tons of CO<sub>2</sub>-eq. per year (negative values are absorption, positive values are emissions) (according to Korotkov et al. [1]): (a) CO<sub>2</sub>; (b) CH<sub>4</sub>; (c) N<sub>2</sub>O; (d) all GHGs.

(a)

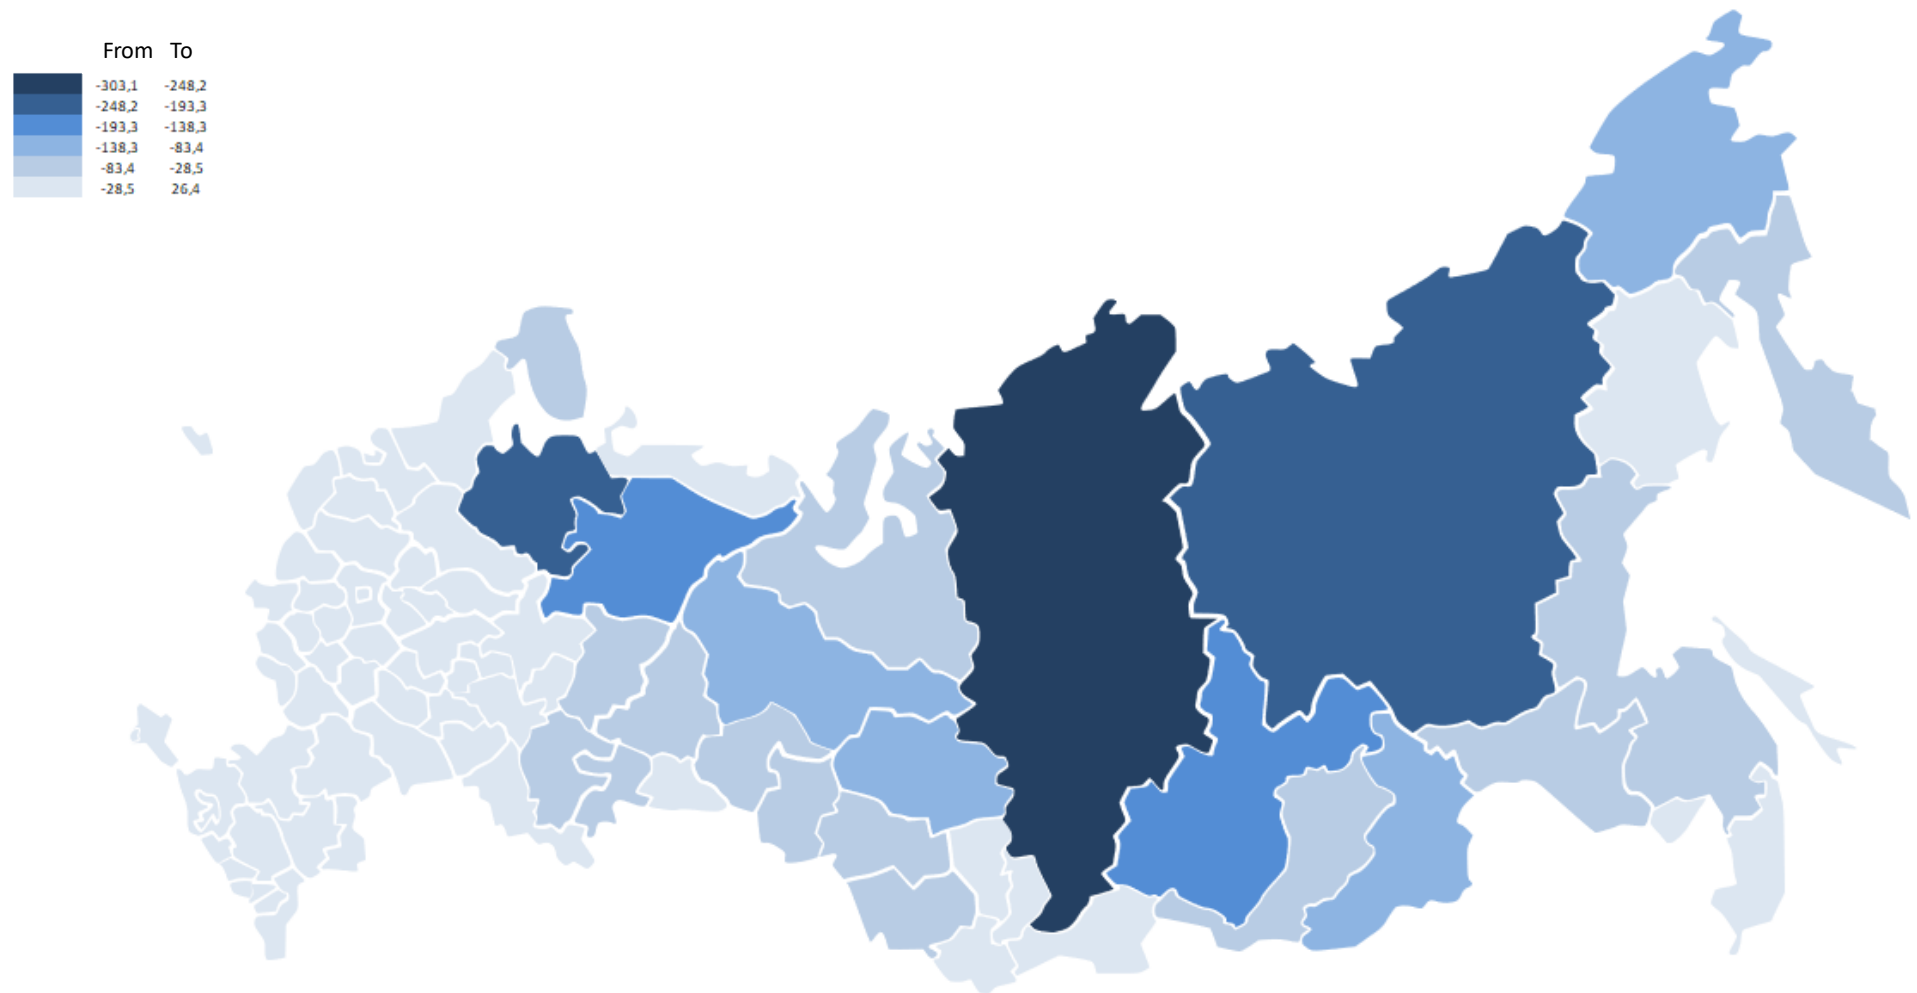

(b)

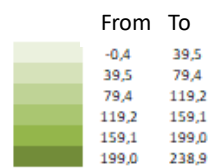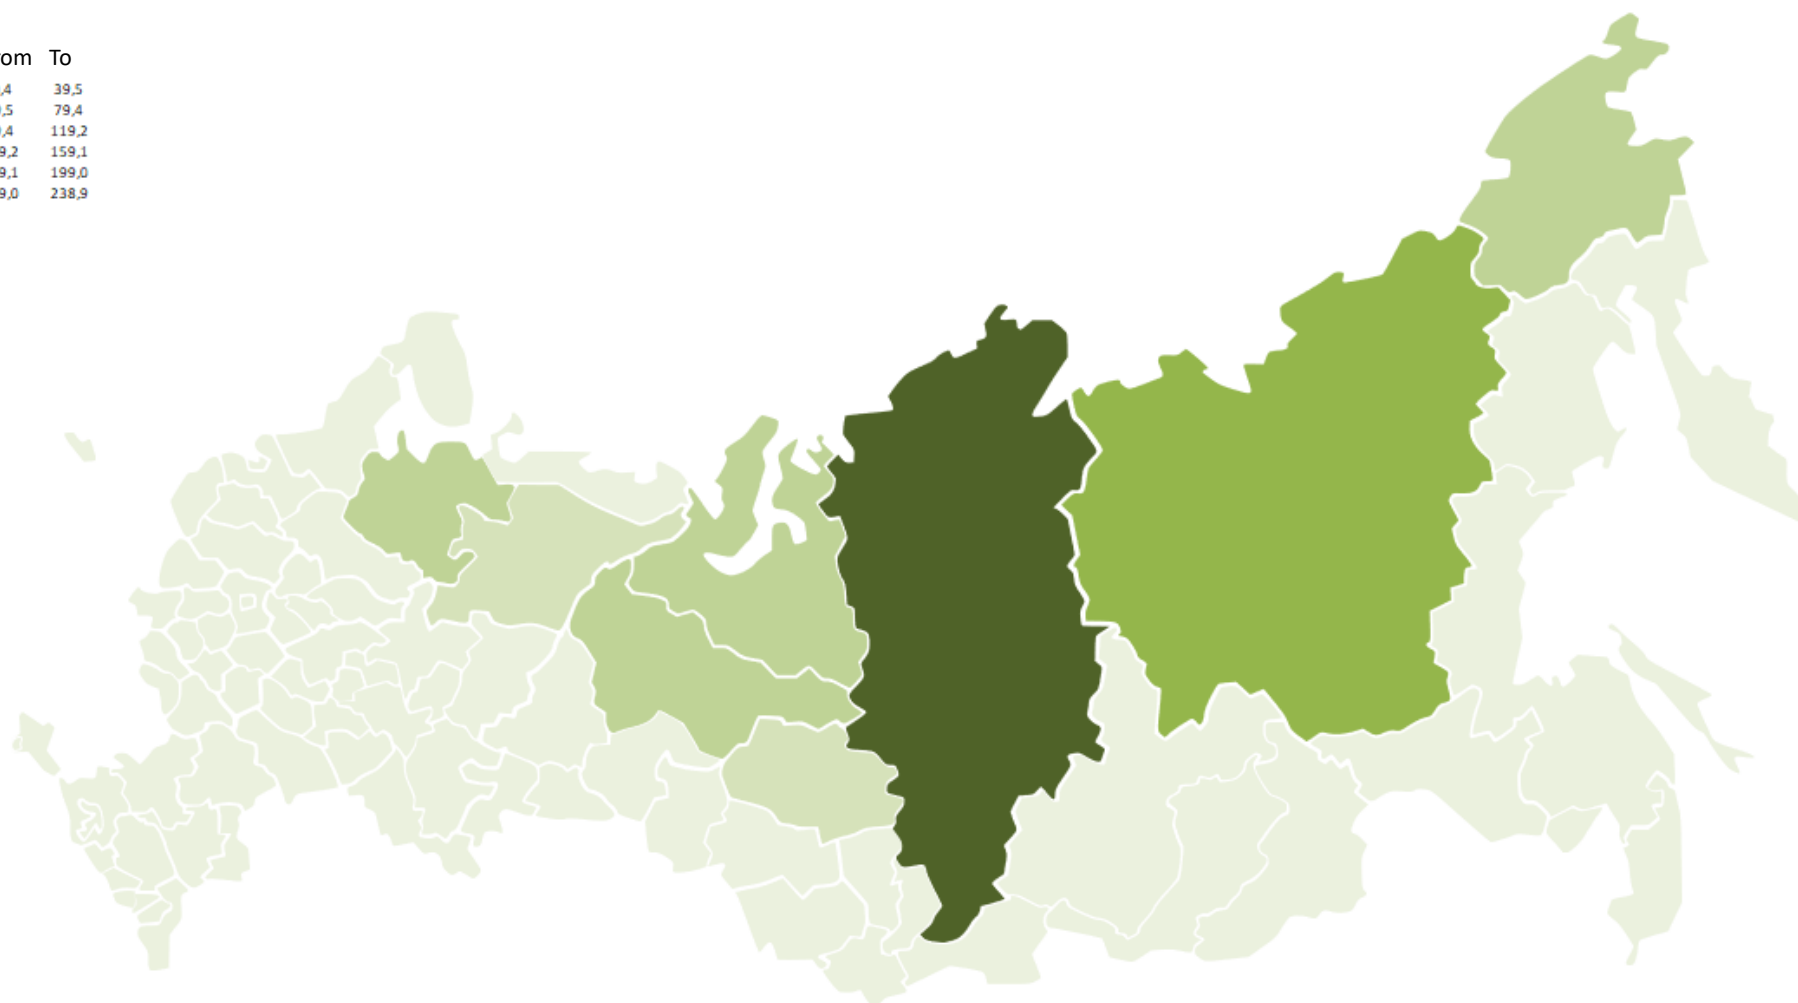

(c)

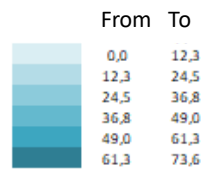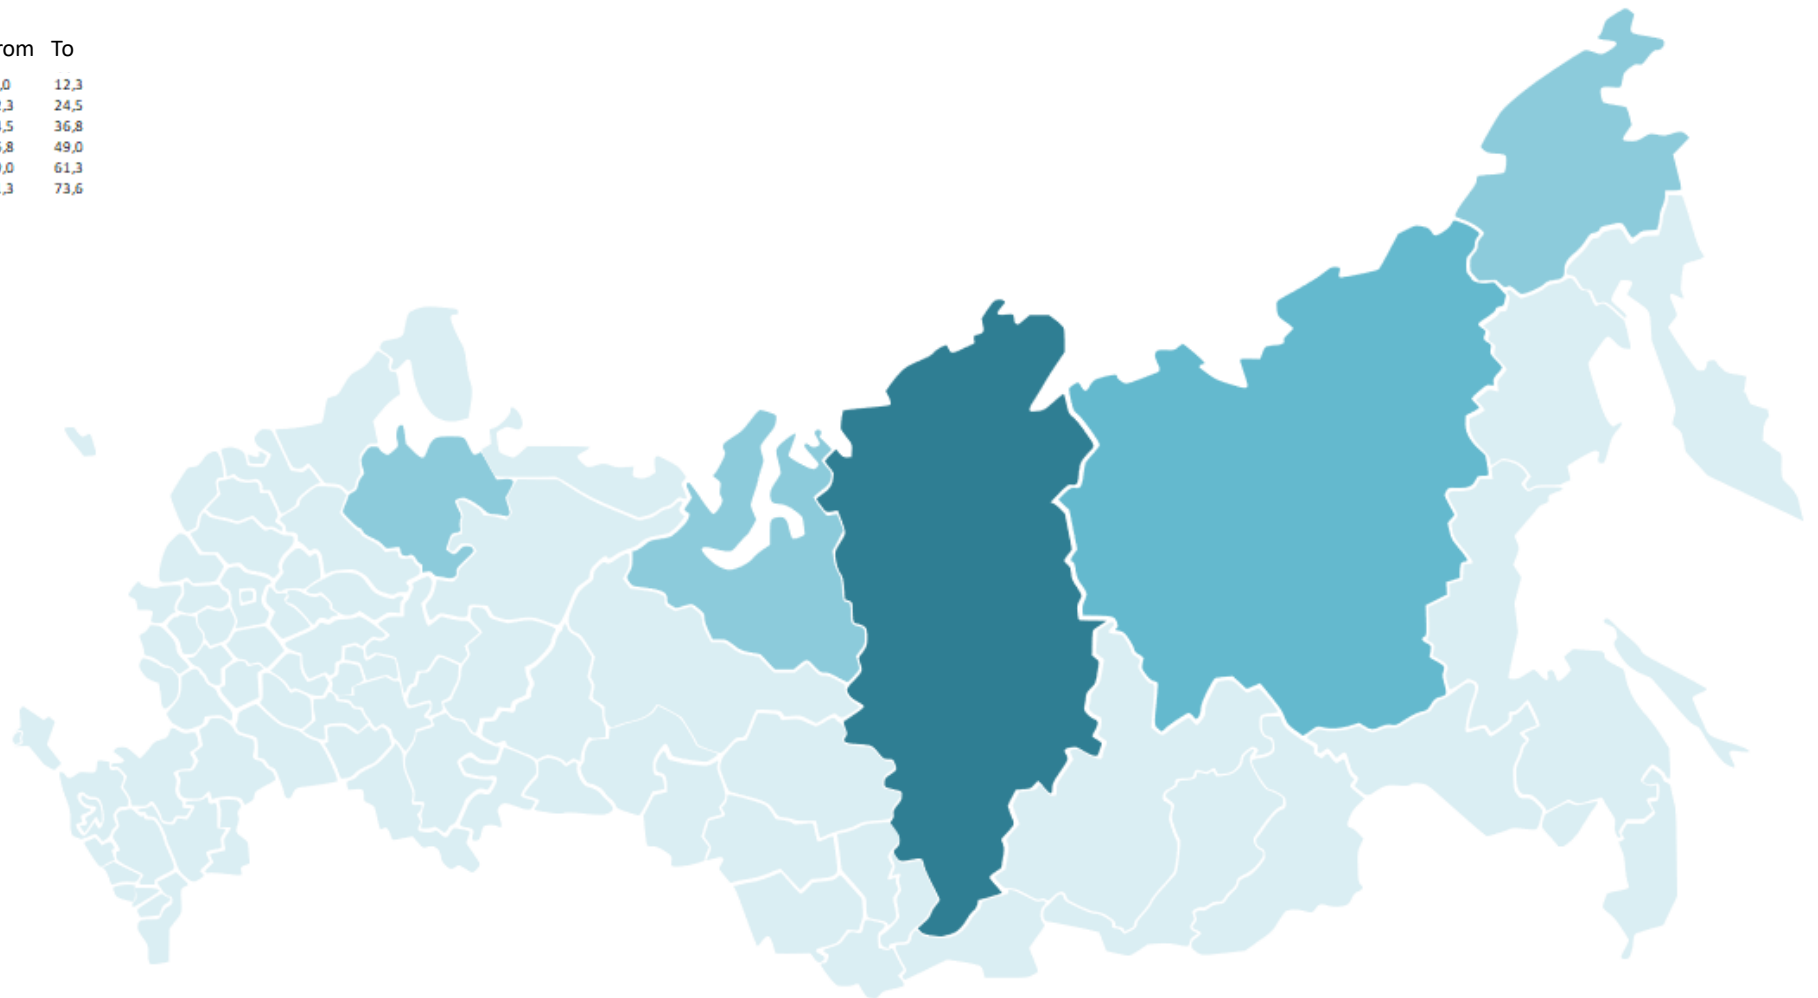

(d)

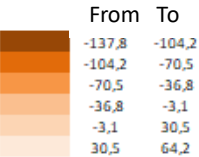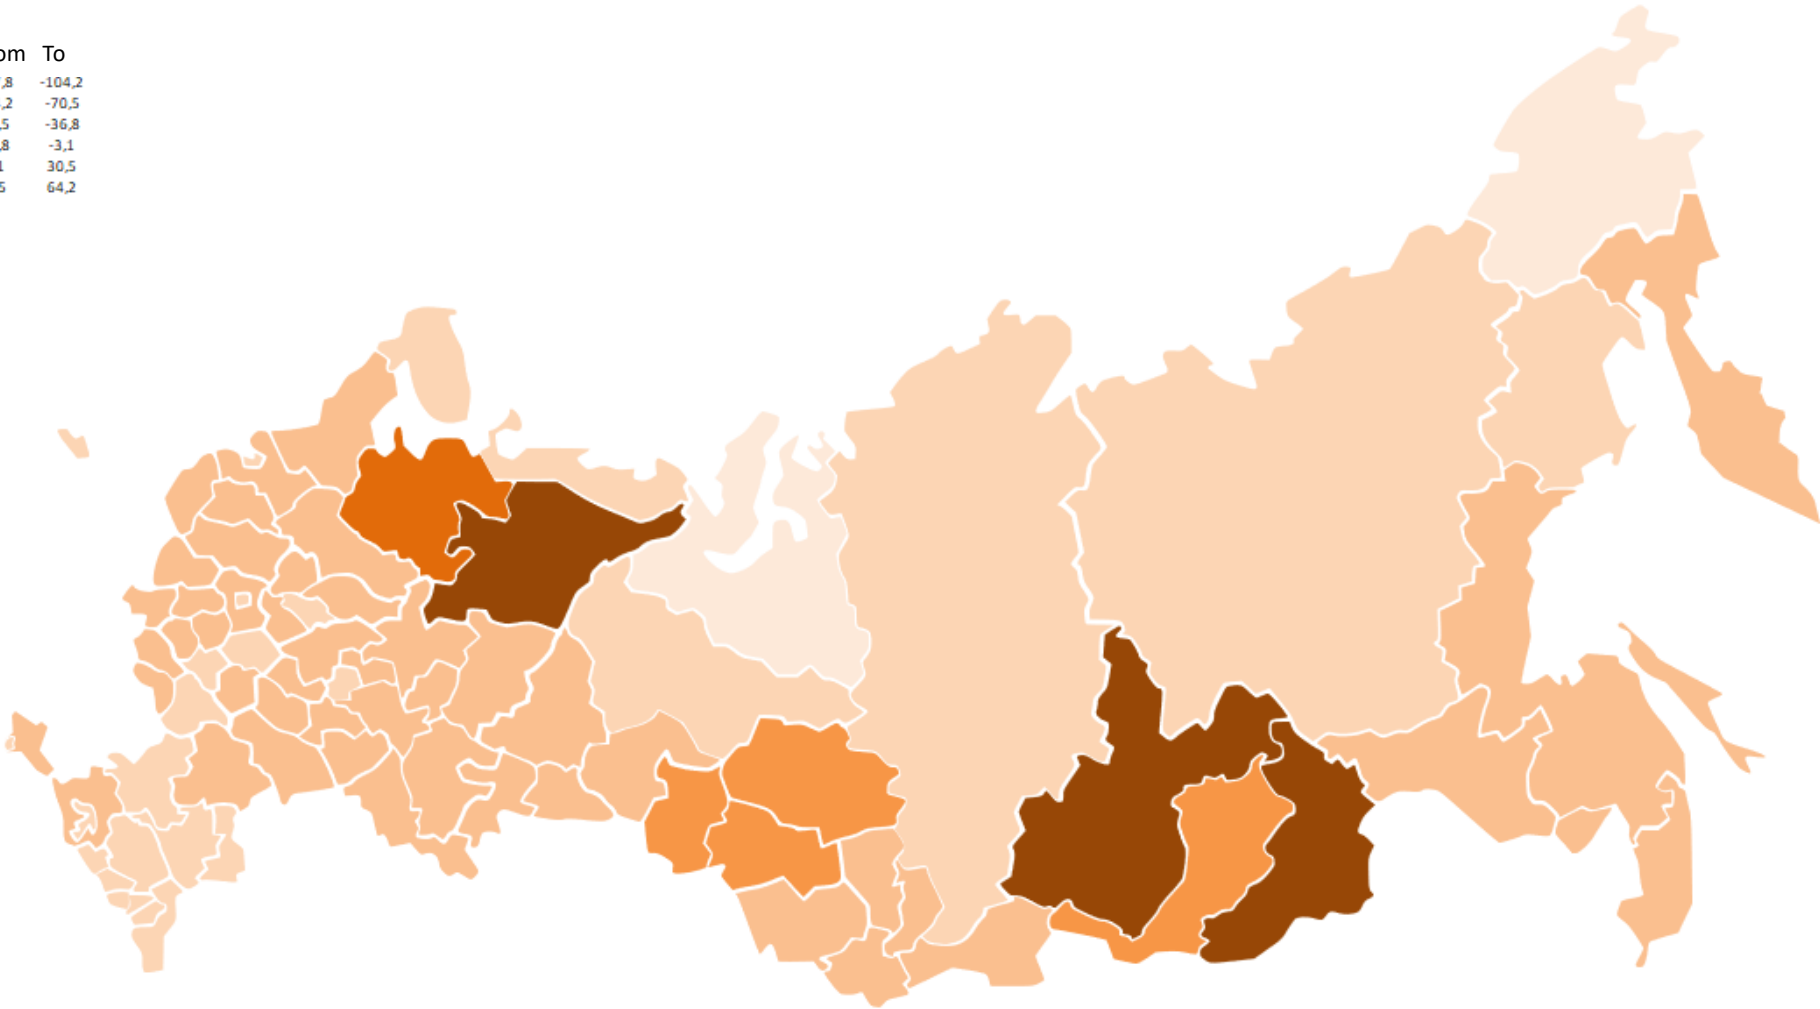

Supplement: s1 [file s1]
